# Supplementary material for: Correlation Study of Biological Activity with Quercetin and Phenolics Content in Onion Extracts
Source: MDPI journal article supplement (doi:10.3390/molecules27238164), 2022-11-23
Supplement: s1 [file s1]

### Supplementary Materials:

**Table S1.** F-values (*p*-values) obtained during the variance analysis of the influence of maceration and extraction in the Soxhlet apparatus as well as that of the extraction solvent type: methanol, acetone, ethyl acetate and chloroform on the fungistatic activity (FA) of the onion scale extracts against various pathogenic fungi (\* $F_{tab} = 4$ ; \*\*  $F_{tab} = 8$ ).

| Effects                                                       |                   | <b>B. cinerea</b>                          | <b>F. culmorum</b>         | <b>R. solani</b>                          | <b>A. alternata</b>        | <b>P. infestans</b>        | <b>A. apis</b>              |
|---------------------------------------------------------------|-------------------|--------------------------------------------|----------------------------|-------------------------------------------|----------------------------|----------------------------|-----------------------------|
| * Solvent type on the FA of extracts obtained during:         | Mac               | 319 (1·10 <sup>-08</sup> )                 | 15 (1·10 <sup>-03</sup> )  | 287 (2·10 <sup>-08</sup> )                | 575 (1·10 <sup>-09</sup> ) | 133 (4·10 <sup>-07</sup> ) | 1463 (3·10 <sup>-11</sup> ) |
|                                                               | Sox               | 926 (2·10 <sup>-10</sup> )                 | 160 (2·10 <sup>-07</sup> ) | 29 (1·10 <sup>-04</sup> )                 | 403 (5·10 <sup>-09</sup> ) | 120 (6·10 <sup>-07</sup> ) | 1164 (7·10 <sup>-11</sup> ) |
| ** Extraction technique on the FA of extracts obtained using: | MeOH              | 91 (7·10 <sup>-04</sup> )                  | 660 (1·10 <sup>-05</sup> ) | 100 (5·10 <sup>-04</sup> )                | 2 (3·10 <sup>-01</sup> )   | 30 (6·10 <sup>-03</sup> )  | 4 (1·10 <sup>-01</sup> )    |
|                                                               | Ac                | 33 (5·10 <sup>-03</sup> )                  | 2 (3·10 <sup>-01</sup> )   | 29 (6·10 <sup>-03</sup> )                 | 8 (5·10 <sup>-02</sup> )   | 16 (2·10 <sup>-02</sup> )  | 4 (1·10 <sup>-01</sup> )    |
|                                                               | EtOAc             | 4·10 <sup>-01</sup> (6·10 <sup>-01</sup> ) | 14 (2·10 <sup>-02</sup> )  | 40 (3·10 <sup>-03</sup> )                 | 1 (3·10 <sup>-01</sup> )   | 36 (4·10 <sup>-03</sup> )  | 28 (6·10 <sup>-03</sup> )   |
|                                                               | CHCl <sub>3</sub> | 0 (1)                                      | 7·10 <sup>04</sup> (1)     | 9·10 <sup>08</sup> (7·10 <sup>-18</sup> ) | 9 (4·10 <sup>-02</sup> )   | 2 (3·10 <sup>-01</sup> )   | 1 (5·10 <sup>-06</sup> )    |

**Table S2.** F-values (*p*-values) obtained during the variance analysis of the influence of maceration and extraction in the Soxhlet apparatus as well as that of the extraction solvent type: methanol, acetone, ethyl acetate, and chloroform on the antioxidant activity (AA) of onion scale extracts assessed by different methods (\* $F_{tab} = 4$ ; \*\*  $F_{tab} = 8$ )

| Effects                                                       |                   | <b>ABTS</b>                | <b>DPPH</b>                | <b>β-carotene</b>          |
|---------------------------------------------------------------|-------------------|----------------------------|----------------------------|----------------------------|
| * Solvent type on the AA of extracts obtained during:         | Mac               | 350 (8·10 <sup>-09</sup> ) | 389 (6·10 <sup>-09</sup> ) | 298 (2·10 <sup>-08</sup> ) |
|                                                               | Sox               | 362 (7·10 <sup>-09</sup> ) | 377 (6·10 <sup>-09</sup> ) | 330 (1·10 <sup>-08</sup> ) |
| ** Extraction technique on the AA of extracts obtained using: | MeOH              | 189 (2·10 <sup>-04</sup> ) | 93 (6·10 <sup>-04</sup> )  | 91 (7·10 <sup>-04</sup> )  |
|                                                               | Ac                | 283 (7·10 <sup>-05</sup> ) | 142 (3·10 <sup>-04</sup> ) | 112 (4·10 <sup>-04</sup> ) |
|                                                               | EtOAc             | 322 (6·10 <sup>-05</sup> ) | 176 (2·10 <sup>-04</sup> ) | 69 (1·10 <sup>-03</sup> )  |
|                                                               | CHCl <sub>3</sub> | 2 (0.27)                   | 14 (2·10 <sup>-02</sup> )  | 40 (3·10 <sup>-03</sup> )  |
